# Supplementary material for: Effect of Combination of KMnO4 Oxidation and UV-C Radiation on Postharvest Quality of Refrigerated Pears cv. ‘Ercolini’
Source: MDPI journal article supplement (doi:10.3390/horticulturae8111078), 2022-11-16
Supplement: s1 [file s1]

## Supplementary Material

**Supplementary Table S1.** Evolution during storage time of the physical variables in pears subjected to the different treatments: 1 °C-C (Control), 1 °C-F (Filter), 1 °C-FD (Filter + Device), 8 °C-C (Control), 8 °C-F (Filter) and 8 °C-FD (Filter + Device). The means  $\pm$  standard error of the means (SEM) are shown. Different letters for each treatment represent statistically significant differences according to Tukey test. n = 5.

| Storage days | Treatment       | Weight (g)        | Calliper (mm)     | Firmness (N)      |
|--------------|-----------------|-------------------|-------------------|-------------------|
| 0            | all             | 97.24 $\pm$ 3.23  | 53.00 $\pm$ 0.62  | 48.9 $\pm$ 1.7    |
| 7            | 1 °C-C          | 75.9 $\pm$ 3.5 b  | 47.8 $\pm$ 1.0 b  | 41.7 $\pm$ 1.9 ab |
|              | 1 °C-F          | 95.7 $\pm$ 6.9 ab | 52.5 $\pm$ 1.4 ab | 45.1 $\pm$ 1.5 ab |
|              | 1 °C-FD         | 99.6 $\pm$ 11.5 a | 54.0 $\pm$ 1.4 a  | 48.4 $\pm$ 1.7 ab |
|              | 8 °C-C          | 98.0 $\pm$ 5.0 a  | 53.3 $\pm$ 0.9 a  | 39.9 $\pm$ 4.1 b  |
|              | 8 °C-F          | 96.3 $\pm$ 4.2 ab | 53.8 $\pm$ 1.0 a  | 46.6 $\pm$ 1.4 ab |
|              | 8 °C-FD         | 99.7 $\pm$ 2.2 a  | 53.8 $\pm$ 0.5 a  | 49.9 $\pm$ 3.3 a  |
|              | Ethylene (E)    | *                 | **                | ***               |
| 14           | Temperature (T) | n.s.              | n.s.              | n.s.              |
|              | E x T           | n.s.              | **                | n.s.              |
|              | 1 °C-C          | 74.4 $\pm$ 3.5 b  | 47.3 $\pm$ 0.8 b  | 37.7 $\pm$ 2.4 b  |
|              | 1 °C-F          | 92.9 $\pm$ 6.9 ab | 53.3 $\pm$ 1.7 a  | 49.1 $\pm$ 2.0 a  |
|              | 1 °C-FD         | 98.0 $\pm$ 11.2 a | 52.0 $\pm$ 1.1 a  | 50.4 $\pm$ 1.5 a  |
|              | 8 °C-C          | 96.1 $\pm$ 5.1 a  | 52.5 $\pm$ 0.6 a  | 40.9 $\pm$ 1.4 b  |
|              | 8 °C-F          | 94.3 $\pm$ 3.9 ab | 53.5 $\pm$ 1.4 a  | 43.9 $\pm$ 2.6 ab |
| 21           | 8 °C-FD         | 96.7 $\pm$ 2.0 a  | 53.5 $\pm$ 0.5 a  | 43.5 $\pm$ 2.7 ab |
|              | Ethylene (E)    | n.s.              | **                | ***               |
|              | Temperature (T) | n.s.              | ***               | *                 |
|              | E x T           | *                 | **                | *                 |
|              | 1 °C-C          | 72.9 $\pm$ 3.3 b  | 45.3 $\pm$ 0.8 b  | 36.8 $\pm$ 2.8 cd |
|              | 1 °C-F          | 90.5 $\pm$ 6.8 ab | 52.5 $\pm$ 1.5 a  | 43.9 $\pm$ 1.2 b  |
|              | 1 °C-FD         | 96.6 $\pm$ 10.7 a | 51.0 $\pm$ 0.7 a  | 47.3 $\pm$ 1.6 a  |
| 28           | 8 °C-C          | 94.2 $\pm$ 5.2 a  | 50.5 $\pm$ 0.9 a  | 30.9 $\pm$ 2.2 d  |
|              | 8 °C-F          | 92.5 $\pm$ 3.6 ab | 52.3 $\pm$ 1.4 a  | 40.4 $\pm$ 1.6 bc |
|              | 8 °C-FD         | 94.8 $\pm$ 1.8 a  | 52.8 $\pm$ 1.1 a  | 41.4 $\pm$ 2.1 bc |
|              | Ethylene (E)    | *                 | ***               | ***               |
|              | Temperature (T) | n.s.              | **                | ***               |
|              | E x T           | *                 | **                | n.s.              |
|              | 1 °C-C          | 67.6 $\pm$ 3.3 b  | 41.3 $\pm$ 0.9 b  | 34.4 $\pm$ 1.6 c  |
| 28           | 1 °C-F          | 90.7 $\pm$ 7.2 a  | 49.0 $\pm$ 0.9 a  | 43.4 $\pm$ 1.6 ab |
|              | 1 °C-FD         | 98.5 $\pm$ 9.8 a  | 49.0 $\pm$ 0.4 a  | 44.9 $\pm$ 2.1 a  |
|              | 8 °C-C          | 92.6 $\pm$ 5.2 a  | 44.8 $\pm$ 1.3 b  | 26.1 $\pm$ 2.6 d  |
|              | 8 °C-F          | 89.7 $\pm$ 3.1 a  | 48.5 $\pm$ 1.0 a  | 33.0 $\pm$ 1.8 c  |
|              | 8 °C-FD         | 93.6 $\pm$ 1.9 a  | 51.3 $\pm$ 1.7 a  | 37.4 $\pm$ 2.1 bc |
|              | Ethylene (E)    | **                | ***               | ***               |
|              | Temperature (T) | n.s.              | **                | ***               |
|              | E x T           | **                | n.s.              | n.s.              |

Levels of statistical significance are: \* $p$  < 0.05, \*\* $p$  < 0.01 and \*\*\* $p$  < 0.001. n.s: no significant differences.

**Supplementary Table S2.** Evolution during storage time of the biochemical variables in pears subjected to different treatments: 1 °C-C (Control), 1 °C-F (Filter), 1 °C-FD (Filter + Device), 8 °C-C (Control), 8 °C-F (Filter) and 8 °C-FD (Filter + Device). The variables measured were SSC expressed as percentage; pH; TA expressed as g L<sup>-1</sup> and MI as the SSC(%) / TA(%) ratio. Different letters for each treatment represent statistically significant differences according to Tukey test. n = 5.

| Storage days | Treatment       | SSC (%)        | pH              | TA (g L <sup>-1</sup> ) | MI [SSC (%) / TA (%)] |
|--------------|-----------------|----------------|-----------------|-------------------------|-----------------------|
| 0            | all             | 12.5 ± 0.42    | 4.91 ± 0.01     | 3.69 ± 0.47             | 34.4 ± 2.44           |
| 7            | 1 °C-C          | 13.0 ± 0.58 ab | 5.15 ± 0.08 a   | 3.43 ± 0.08 a           | 37.9 ± 1.41 ab        |
|              | 1 °C-F          | 11.5 ± 0.65 ab | 4.95 ± 0.03 cd  | 3.77 ± 0.37 a           | 31.5 ± 3.55 ab        |
|              | 1 °C-FD         | 11.3 ± 0.75 b  | 4.90 ± 0.03 d   | 3.94 ± 0.29 a           | 28.6 ± 0.71 b         |
|              | 8 °C-C          | 13.3 ± 0.25 a  | 5.15 ± 0.03 a   | 3.18 ± 0.22 a           | 42.1 ± 2.41 ab        |
|              | 8 °C-F          | 12.3 ± 0.75 ab | 5.07 ± 0.03 ab  | 3.10 ± 0.46 a           | 43.3 ± 8.60 a         |
|              | 8 °C-FD         | 11.5 ± 0.65 ab | 5.03 ± 0.04 bcd | 3.43 ± 0.16 a           | 33.5 ± 1.48 ab        |
|              | Ethylene (E)    | **             | ***             | n.s.                    | *                     |
|              | Temperature (T) | n.s.           | **              | *                       | *                     |
|              | E × T           | n.s.           | n.s.            | n.s.                    | n.s.                  |
| 14           | 1 °C-C          | 13.0 ± 0.41 ab | 5.17 ± 0.03 b   | 2.85 ± 0.22 bc          | 46.6 ± 4.06 a         |
|              | 1 °C-F          | 11.8 ± 0.48 bc | 5.00 ± 0.02 cd  | 3.77 ± 0.29 ab          | 31.9 ± 3.40 bc        |
|              | 1 °C-FD         | 10.8 ± 0.48 c  | 4.94 ± 0.02 d   | 4.10 ± 0.37 a           | 26.8 ± 2.60 c         |
|              | 8 °C-C          | 14.3 ± 0.48 a  | 5.28 ± 0.00 a   | 2.60 ± 0.21 c           | 55.8 ± 3.73 a         |
|              | 8 °C-F          | 13.3 ± 0.75 ab | 5.06 ± 0.04 c   | 2.93 ± 0.16 bc          | 45.4 ± 2.58 ab        |
|              | 8 °C-FD         | 12.8 ± 0.48 ab | 5.04 ± 0.03 c   | 2.93 ± 0.37 bc          | 45.9 ± 6.76 ab        |
|              | Ethylene (E)    | ***            | ***             | **                      | ***                   |
|              | Temperature (T) | ***            | ***             | ***                     | ***                   |
|              | E × T           | n.s.           | n.s.            | n.s.                    | n.s.                  |
| 21           | 1 °C-C          | 15.0 ± 0.41 ab | 5.27 ± 0.04 b   | 2.43 ± 0.29 b           | 64.9 ± 9.17 ab        |
|              | 1 °C-F          | 11.5 ± 0.29 d  | 5.06 ± 0.09 bc  | 3.18 ± 0.29 b           | 37.4 ± 4.74 bc        |
|              | 1 °C-FD         | 11.8 ± 0.25 d  | 4.96 ± 0.03 c   | 4.10 ± 0.37 a           | 24.1 ± 2.78 c         |
|              | 8 °C-C          | 15.8 ± 0.48 a  | 5.50 ± 0.07 a   | 2.01 ± 0.31 b           | 84.1 ± 13.26 a        |
|              | 8 °C-F          | 14.0 ± 0.41 bc | 5.16 ± 0.07 bc  | 2.43 ± 0.29 b           | 59.9 ± 6.52 ab        |
|              | 8 °C-FD         | 12.8 ± 0.48 cd | 5.16 ± 0.07 bc  | 2.51 ± 0.35 b           | 54.9 ± 10.37 ab       |
|              | Ethylene (E)    | ***            | ***             | ***                     | ***                   |
|              | Temperature (T) | ***            | ***             | ***                     | ***                   |
|              | E × T           | *              | n.s.            | **                      | n.s.                  |
| 28           | 1 °C-C          | 15.5 ± 0.65 ab | 5.36 ± 0.05 bc  | 1.76 ± 0.29 c           | 95.9 ± 16.2 ab        |
|              | 1 °C-F          | 12.5 ± 0.29 c  | 5.22 ± 0.05 cd  | 2.93 ± 0.29 ab          | 43.7 ± 3.7 c          |
|              | 1 °C-FD         | 12.0 ± 0.41 c  | 5.07 ± 0.04 d   | 3.27 ± 0.46 a           | 39.4 ± 6.3 c          |
|              | 8 °C-C          | 17.5 ± 0.65 a  | 5.72 ± 0.05 a   | 1.51 ± 0.22 c           | 125.5 ± 22.0 a        |
|              | 8 °C-F          | 15.3 ± 1.10 b  | 5.47 ± 0.05 b   | 1.93 ± 0.29 bc          | 84.1 ± 12.1 abc       |
|              | 8 °C-FD         | 15.0 ± 0.41 b  | 5.39 ± 0.12 bc  | 2.09 ± 0.29 bc          | 75.7 ± 10.1 bc        |
|              | Ethylene (E)    | ***            | ***             | ***                     | ***                   |
|              | Temperature (T) | ***            | ***             | ***                     | ***                   |
|              | E × T           | n.s.           | n.s.            | n.s.                    | n.s.                  |

Levels of statistical significance are: \**p* < 0.05, \*\**p* < 0.01 and \*\*\**p* < 0.001. n.s.: no significant differences.

**Supplementary Table S3.** Evolution during storage time of the bioactive compounds in pears subjected to different treatments: 1 °C-C (Control), 1 °C-F (Filter), 1 °C-FD (Filter + Device), 8 °C-C (Control), 8 °C-F (Filter) and 8 °C-FD (Filter + Device). Ascorbic acid content (mg 100mL<sup>-1</sup>); ORAC (μmolTrollox.Eq. kg<sup>-1</sup>) and total phenolic compounds (g<sub>galic acid</sub> kg<sup>-1</sup>). n = 5.

| Storage days | Treatment       | Ascorbic acid<br>(mg 100mL <sup>-1</sup> ) | Total phenolic compounds<br>(g <sub>galic acid</sub> kg <sup>-1</sup> ) | Antioxidant Capacity<br>ORAC<br>(μmolTrollox.Eq. kg <sup>-1</sup> ) |
|--------------|-----------------|--------------------------------------------|-------------------------------------------------------------------------|---------------------------------------------------------------------|
| 0            | all             | 5.0 ± 0.47                                 | 0.49 ± 0.03                                                             | 4.17 ± 0.08                                                         |
| 7            | 1 °C-C          | 4.1 ± 0.27 b                               | 0.37 ± 0.02 a                                                           | 3.44 ± 0.09 a                                                       |
|              | 1 °C-F          | 5.1 ± 0.32 ab                              | 0.41 ± 0.04 a                                                           | 3.68 ± 0.10 a                                                       |
|              | 1 °C-FD         | 5.3 ± 0.28 a                               | 0.43 ± 0.07 a                                                           | 3.72 ± 0.12 a                                                       |
|              | 8 °C-C          | 4.7 ± 0.38 ab                              | 0.35 ± 0.05 a                                                           | 3.31 ± 0.18 a                                                       |
|              | 8 °C-F          | 4.6 ± 0.27 ab                              | 0.36 ± 0.05 a                                                           | 3.39 ± 0.09 a                                                       |
|              | 8 °C-FD         | 4.8 ± 0.13 ab                              | 0.37 ± 0.04 a                                                           | 3.48 ± 0.15 a                                                       |
|              | Ethylene (E)    | n.s.                                       | n.s.                                                                    | n.s.                                                                |
| 14           | Temperature (T) | n.s.                                       | *                                                                       | *                                                                   |
|              | E x T           | n.s.                                       | n.s.                                                                    | n.s.                                                                |
|              | 1 °C-C          | 4.0 ± 0.39 ab                              | 0.35 ± 0.04 b                                                           | 3.26 ± 0.12 abc                                                     |
|              | 1 °C-F          | 4.5 ± 0.18 ab                              | 0.42 ± 0.03 a                                                           | 3.45 ± 0.17 ab                                                      |
|              | 1 °C-FD         | 5.4 ± 0.21 a                               | 0.43 ± 0.03 a                                                           | 3.66 ± 0.05 a                                                       |
|              | 8 °C-C          | 3.4 ± 0.41 b                               | 0.36 ± 0.04 ab                                                          | 2.80 ± 0.05 c                                                       |
|              | 8 °C-F          | 3.5 ± 0.47 b                               | 0.42 ± 0.04 ab                                                          | 2.96 ± 0.10 bc                                                      |
|              | 8 °C-FD         | 4.3 ± 0.52 ab                              | 0.41 ± 0.04 ab                                                          | 3.26 ± 0.19 abc                                                     |
| 21           | Ethylene (E)    | **                                         | ***                                                                     | **                                                                  |
|              | Temperature (T) | **                                         | n.s.                                                                    | ***                                                                 |
|              | E x T           | n.s.                                       | n.s.                                                                    | n.s.                                                                |
|              | 1 °C-C          | 3.3 ± 0.57 ab                              | 0.31 ± 0.01 c                                                           | 2.41 ± 0.08 b                                                       |
|              | 1 °C-F          | 4.4 ± 0.48 ab                              | 0.36 ± 0.03 ab                                                          | 2.94 ± 0.13 ab                                                      |
|              | 1 °C-FD         | 5.1 ± 0.27 a                               | 0.42 ± 0.06 a                                                           | 3.39 ± 0.14 a                                                       |
|              | 8 °C-C          | 2.8 ± 0.82 b                               | 0.28 ± 0.03 bc                                                          | 2.50 ± 0.17 b                                                       |
| 28           | 8 °C-F          | 3.6 ± 0.54 ab                              | 0.34 ± 0.03 bc                                                          | 2.90 ± 0.19 ab                                                      |
|              | 8 °C-FD         | 3.5 ± 0.64 ab                              | 0.38 ± 0.05 ab                                                          | 2.99 ± 0.16 ab                                                      |
|              | Ethylene (E)    | *                                          | ***                                                                     | ***                                                                 |
|              | Temperature (T) | n.s.                                       | *                                                                       | n.s.                                                                |
|              | E x T           | n.s.                                       | n.s.                                                                    | n.s.                                                                |
|              | 1 °C-C          | 2.9 ± 0.37 bcd                             | 0.26 ± 0.02 cd                                                          | 2.18 ± 0.14 c                                                       |
|              | 1 °C-F          | 3.8 ± 0.28 ab                              | 0.35 ± 0.04 ab                                                          | 2.83 ± 0.06 ab                                                      |
|              | 1 °C-FD         | 4.4 ± 0.21 a                               | 0.39 ± 0.03 a                                                           | 3.14 ± 0.22 a                                                       |
|              | 8 °C-C          | 1.7 ± 0.22 d                               | 0.21 ± 0.04 d                                                           | 1.78 ± 0.14 d                                                       |
|              | 8 °C-F          | 2.0 ± 0.39 cd                              | 0.29 ± 0.05 bc                                                          | 2.21 ± 0.05 c                                                       |
|              | 8 °C-FD         | 3.1 ± 0.48 abc                             | 0.36 ± 0.05 ab                                                          | 2.56 ± 0.19 bc                                                      |
|              | Ethylene (E)    | ***                                        | ***                                                                     | ***                                                                 |
|              | Temperature (T) | ***                                        | **                                                                      | ***                                                                 |
|              | E x T           | n.s.                                       | n.s.                                                                    | n.s.                                                                |

Levels of statistical significance are: \**p* < 0.05, \*\**p* < 0.01 and \*\*\**p* < 0.001. n.s: no significant differences.

**Supplementary Table S4.** Principal Component Analysis

| <i>Component</i> | <i>Eigenvalue</i> | <i>Percentage of Variance</i> | <i>Percentage Cumulative</i> |
|------------------|-------------------|-------------------------------|------------------------------|
| <i>Number</i>    |                   |                               |                              |
| 1                | 4.88752           | 61.094                        | 61.094                       |
| 2                | 1.39294           | 17.412                        | 78.506                       |
| 3                | 0.503841          | 6.298                         | 84.804                       |
| 4                | 0.462841          | 5.786                         | 90.589                       |
| 5                | 0.32104           | 4.013                         | 94.602                       |
| 6                | 0.18995           | 2.374                         | 96.977                       |
| 7                | 0.171857          | 2.148                         | 99.125                       |
| 8                | 0.0700082         | 0.875                         | 100.000                      |

**Supplementary Table S5.** Table of Component Weights

| <i>Variables</i> | <i>Component 1</i> | <i>Component 2</i> |
|------------------|--------------------|--------------------|
| W                | 0.136874           | -0.721129          |
| C                | 0.244078           | -0.61051           |
| Firmness         | 0.410988           | 0.17938            |
| pH               | -0.374602          | -0.201463          |
| MI               | -0.389673          | -0.0688857         |
| AA               | 0.374024           | 0.1164             |
| ORAC             | 0.404848           | 0.117436           |
| FC               | 0.395996           | -0.0489863         |

**Supplementary Table S6a.** This table shows the scores of the principal components.

| <i>Row</i> | <i>Label</i> | <i>Component 1</i> | <i>Component 2</i> | <i>Average Component 1</i> | <i>Average Component 2</i> |
|------------|--------------|--------------------|--------------------|----------------------------|----------------------------|
| 1          | 1°C-C        | -1.67612           | 1.87647            | <b>-1.43</b>               | <b>1.99</b>                |
| 2          | 1°C-C        | -2.13255           | 2.22965            |                            |                            |
| 3          | 1°C-C        | -0.802021          | 1.38467            |                            |                            |
| 4          | 1°C-C        | -1.1944            | 2.48024            |                            |                            |
| 5          | 1°C-C        | -1.34514           | 2.0008             |                            |                            |
| 6          | 1°C-F        | 1.5194             | 0.907887           | <b>1.89</b>                | <b>0.13</b>                |
| 7          | 1°C-F        | 1.43937            | 0.861018           |                            |                            |
| 8          | 1°C-F        | 1.95694            | -1.02702           |                            |                            |
| 9          | 1°C-F        | 2.62496            | -0.232992          |                            |                            |
| 10         | 1°C-F        | 1.89434            | 0.127591           |                            |                            |
| 11         | 1°C-FD       | 3.90686            | 1.19768            | <b>3.00</b>                | <b>-0.01</b>               |
| 12         | 1°C-FD       | 3.0313             | 0.681197           |                            |                            |
| 13         | 1°C-FD       | 2.84717            | -0.0815062         |                            |                            |
| 14         | 1°C-FD       | 2.20524            | -1.82426           |                            |                            |
| 15         | 1°C-FD       | 3.02963            | -0.00160516        |                            |                            |

|    |        |           |           |              |              |
|----|--------|-----------|-----------|--------------|--------------|
| 16 | 8°C-C  | -3.64153  | -1.66769  | <b>-3.25</b> | <b>-0.66</b> |
| 17 | 8°C-C  | -3.33574  | -0.353362 |              |              |
| 18 | 8°C-C  | -4.25288  | -1.01695  |              |              |
| 19 | 8°C-C  | -1.90728  | 0.349575  |              |              |
| 20 | 8°C-C  | -3.08984  | -0.614625 |              |              |
| 21 | 8°C-F  | -0.192641 | -1.08807  | <b>-0.97</b> | <b>-0.57</b> |
| 22 | 8°C-F  | -1.386    | -0.469361 |              |              |
| 23 | 8°C-F  | -1.43603  | 0.117535  |              |              |
| 24 | 8°C-F  | -0.893043 | -0.854334 |              |              |
| 25 | 8°C-F  | -0.919846 | -0.561971 |              |              |
| 26 | 8°C-FD | 0.36829   | -0.789111 | <b>0.75</b>  | <b>-0.88</b> |
| 27 | 8°C-FD | 1.58849   | -0.743653 |              |              |
| 28 | 8°C-FD | 0.739018  | -0.287147 |              |              |
| 29 | 8°C-FD | 0.274042  | -1.72634  |              |              |
| 30 | 8°C-FD | 0.780022  | -0.874298 |              |              |

**Supplementary Table S6b.** ANOVA table for the component 1 scores according to the treatments

| Source        | Sum of squares | Gl | Source   | Sum of squares | Source |
|---------------|----------------|----|----------|----------------|--------|
| Intergroup    | 133.289        | 5  | 26.6577  | 75.72          | 0.0000 |
| Intragroup    | 8.44947        | 24 | 0.352061 |                |        |
| Total (Corr.) | 141.738        | 29 |          |                |        |

**Supplementary Table S6c.** Multiple comparisons test for the component 1 scores by treatments using Tukey HSD method

| Treatments | Replicates | Mean      | Homogenous groups |
|------------|------------|-----------|-------------------|
| 8 °C-C     | 5          | -3.24545  | d                 |
| 1 °C-C     | 5          | -1.43005  | c                 |
| 8 °C-F     | 5          | -0.965512 | c                 |
| 8 °C-FD    | 5          | 0.749972  | b                 |
| 1 °C-F     | 5          | 1.887     | a                 |
| 1 °C-FD    | 5          | 3.00404   | a                 |

**Supplementary Table S6d.** ANOVA table for the component 2 scores according to the treatments

| Source        | Sum of squares | Gl | Source   | Sum of squares | Source |
|---------------|----------------|----|----------|----------------|--------|
| Intergroup    | 27.6905        | 5  | 5.5381   | 10.46          | 0.0000 |
| Intragroup    | 12.7048        | 24 | 0.529366 |                |        |
| Total (Corr.) | 40.3953        | 29 |          |                |        |

**Supplementary Table S6e.** Multiple comparisons test for the component 2 scores by treatments using Tukey's HSD method

| Treatments | Replicates | Mean        | Homogenous groups |
|------------|------------|-------------|-------------------|
| 8 °C-FD    | 5          | -0.88411    | c                 |
| 8 °C-C     | 5          | -0.66061    | b                 |
| 8 °C-F     | 5          | -0.57124    | b                 |
| 1 °C-FD    | 5          | -0.00569887 | b                 |
| 1 °C-F     | 5          | 0.127297    | b                 |
| 1 °C-C     | 5          | 1.99437     | a                 |

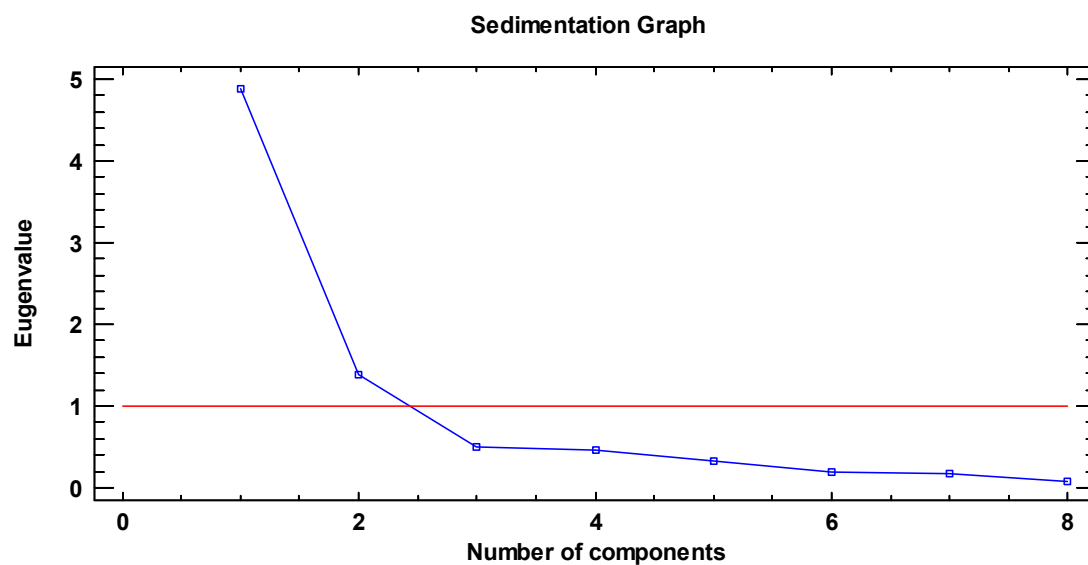

Supplementary Figure S1. Sedimentation graph

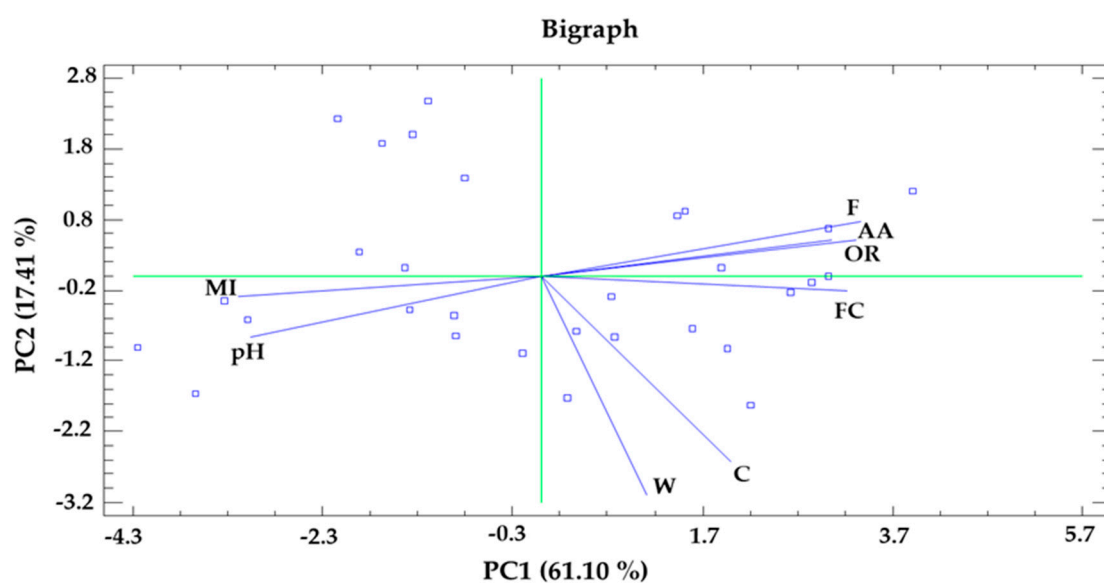

Supplementary Figure S2. Graphical representation of the principal components marking with lines for each variables and wit points for each score.
